# Supplementary material for: Inferring decoding strategies for multiple correlated neural populations
Source: PubMed Central journal article supplement (PMC6188888; doi:10.1371/journal.pcbi.1006371), 2018-09-24

Vestibular

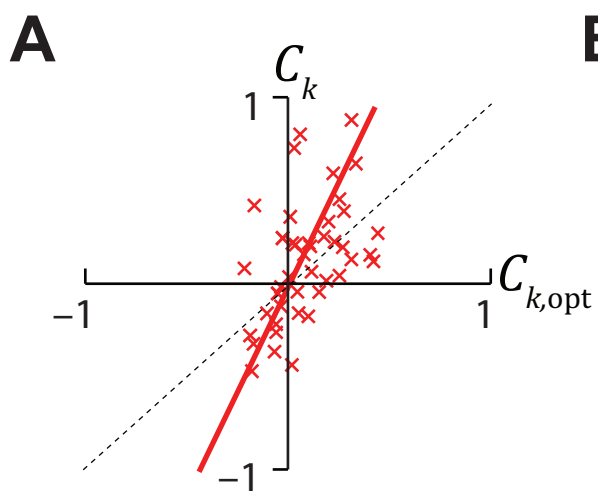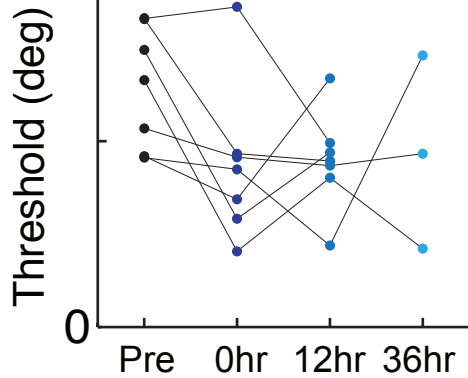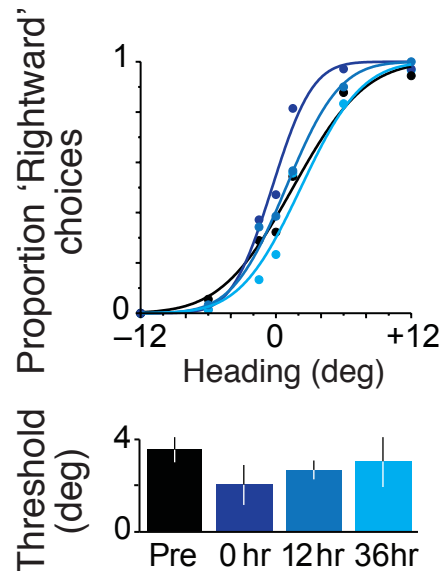

Visual

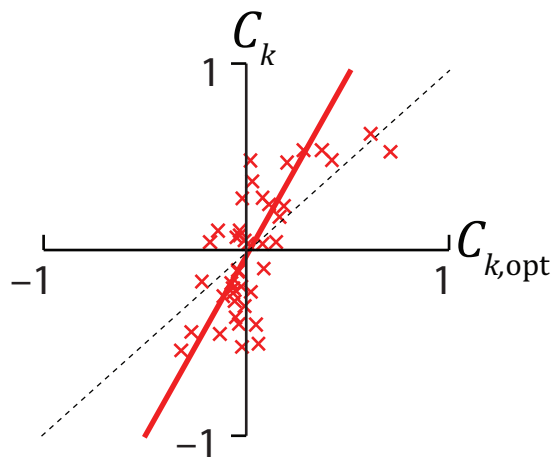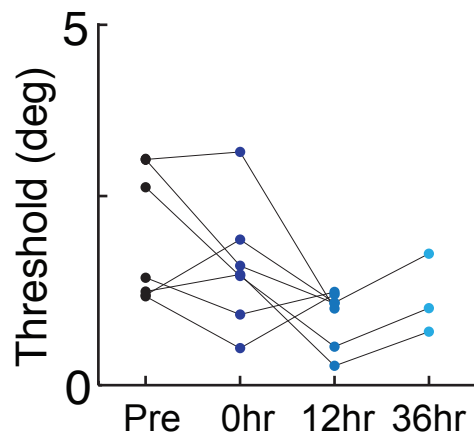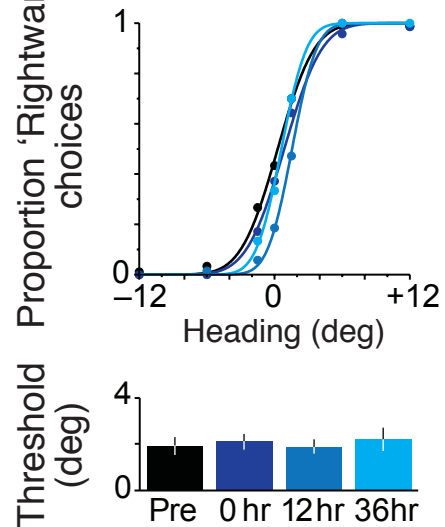

Supplement: pcbi.1006371.s005.pdf [file pcbi.1006371.s005.pdf]
