# Supplementary material for: Inferring decoding strategies for multiple correlated neural populations
Source: PubMed Central journal article supplement (PMC6188888; doi:10.1371/journal.pcbi.1006371), 2018-09-24
Supplement: pcbi.1006371.s007.pdf [file pcbi.1006371.s007.pdf]

## Vestibular

Noise correlation,  $R_{ij}^{\text{noise}}$

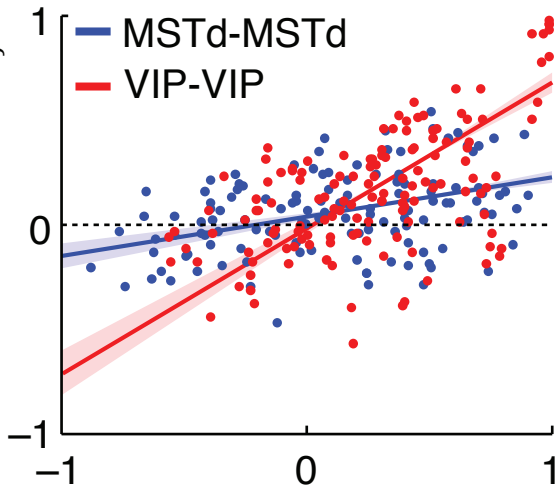

## Visual

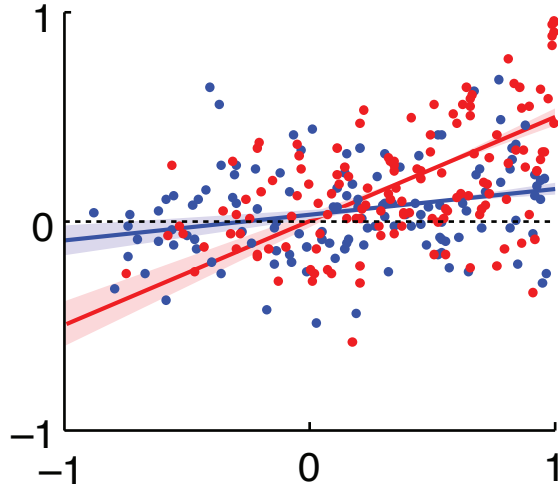

Signal correlation,  $R_{ij}^{\text{sig}}$
