# Supplementary material for: Inferring decoding strategies for multiple correlated neural populations
Source: PubMed Central journal article supplement (PMC6188888; doi:10.1371/journal.pcbi.1006371), 2018-09-24

**A**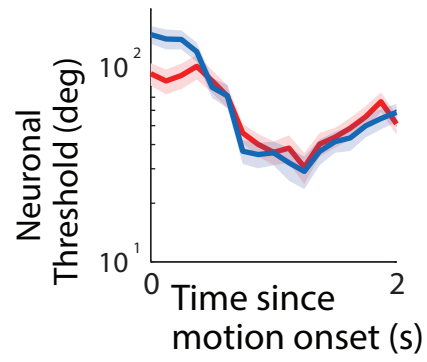**C**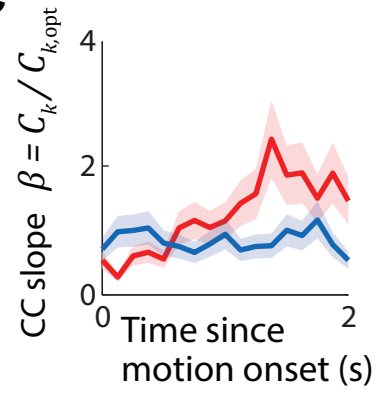**E**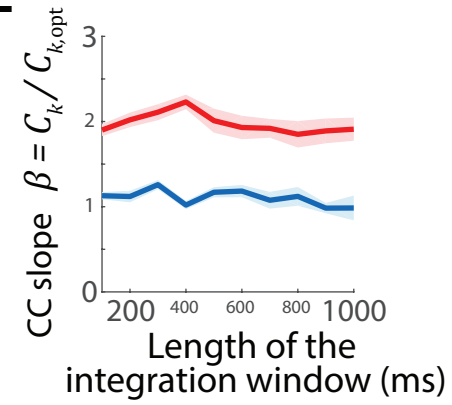**B**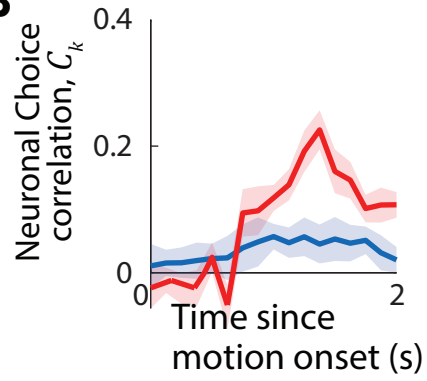**D**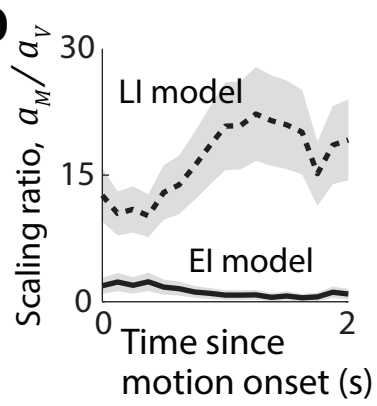**F**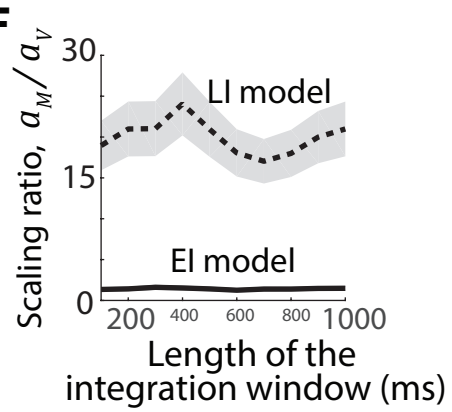

Supplement: pcbi.1006371.s013.pdf [file pcbi.1006371.s013.pdf]
