# Supplementary material for: Inferring decoding strategies for multiple correlated neural populations
Source: PubMed Central journal article supplement (PMC6188888; doi:10.1371/journal.pcbi.1006371), 2018-09-24
Supplement: pcbi.1006371.s017.pdf [file pcbi.1006371.s017.pdf]

| <b>Model</b>             |                                                     | <b>Extensive information model<sup>†</sup></b>                      | <b>Limited information model</b>                                    |
|--------------------------|-----------------------------------------------------|---------------------------------------------------------------------|---------------------------------------------------------------------|
| <b>Model parameters</b>  | Noise magnitudes                                    | $\varepsilon_{MM} = 6, \varepsilon_{VV} = 25, \varepsilon_{MV} = 0$ | $\varepsilon_{MM} = 6, \varepsilon_{VV} = 36, \varepsilon_{MV} = 9$ |
|                          | Multiplicative scaling of CCs relative to optimal   | $\beta_M = 0.67, \beta_V = 1.6$                                     | $\beta_M = 1.2, \beta_V = 2.0$                                      |
|                          | Optimal weights                                     | $ a_M/a_V  = 3.8 \pm 0.7$                                           | $ a_M/a_V  = 18 \pm 6$                                              |
|                          | Inferred weights                                    | $ a_M/a_V  = 1.5 \pm 0.3$                                           | $ a_M/a_V  = 24 \pm 13$                                             |
| <b>Model predictions</b> | Multiplicative change in CCs following inactivation | $\zeta_M = 1.6 \pm 0.2$<br>$\zeta_V = 1.9 \pm 0.4$                  | $\zeta_M = 0.8 \pm 0.3$<br>$\zeta_V = 1.4 \pm 0.5$                  |
