# Supplementary material for: Inferring decoding strategies for multiple correlated neural populations
Source: PubMed Central journal article supplement (PMC6188888; doi:10.1371/journal.pcbi.1006371), 2018-09-24
Supplement: pcbi.1006371.s018.pdf [file pcbi.1006371.s018.pdf]

## S1 Choice Probability and Choice Correlation

Neuronal choice probability ( $CP_k$ ) is, roughly, the probability of correctly guessing the behavioural response on a given trial based only on the response  $r_k$  of that particular neuron  $k$ . More precisely, it is the probability that a neural response drawn randomly from one choice-conditioned distribution  $p(r_k|\text{choice} > 0)$  is greater than another neural response from the same neuron but drawn from the other choice-conditioned distribution  $p(r_k|\text{choice} < 0)$ . In our model, choice is taken to be the sign of the estimated stimulus  $\hat{s}$ .

Choice correlation ( $C_k$ ) is simply the trial-by-trial correlation coefficient between neuronal responses and the animal's internal estimate of the stimulus  $\hat{s}$ . For a task with only two possible behavioural responses, like heading discrimination, and for Gaussian-distributed neuronal responses, these quantities are related according to [3]:

$$CP_k = \frac{1}{2} + \frac{2}{\pi} \arctan(2C_k^{-2} - 1)^{-1/2}$$

The following equation provides an excellent approximation [3] and was used throughout the paper instead of the above equation.

$$CP_k \approx \frac{1}{2} + \frac{\sqrt{2}}{\pi} C_k \tag{S1.1}$$

For convenience, we will express all relations in terms of choice correlations. Corresponding expressions for choice probabilities will follow from equations above.
