# Supplementary material for: Inferring decoding strategies for multiple correlated neural populations
Source: PubMed Central journal article supplement (PMC6188888; doi:10.1371/journal.pcbi.1006371), 2018-09-24
Supplement: pcbi.1006371.s020.pdf [file pcbi.1006371.s020.pdf]

### S3 Effects of suboptimal decoding on behavioural threshold

In **S2 Text**, we showed how the optimal thresholds depend on the covariance  $\varepsilon_{xx}$ ,  $\varepsilon_{yy}$ , and  $\varepsilon_{xy}$ . We will now investigate how behavioural thresholds are affected by suboptimal scaling of the different populations.

#### S3.1 Limited information model: multiple populations

It is convenient to write the combined readout weights of multiple areas as  $\mathbf{w} = W\mathbf{a}$  where  $W$  is an  $N \times Z$  block diagonal matrix  $W = \begin{bmatrix} \mathbf{w}_x & \mathbf{0} \\ \mathbf{0} & \ddots \end{bmatrix}$  whose nonzero entries  $\mathbf{w}_x$  correspond to the patterns of decoder weights within a single population, each yielding individually unbiased estimates, and elements of  $\mathbf{a}$  are the scaling factors on these weights. For unbiased decoding of each population separately, as well as together, we require  $W^T F = I$  and  $\mathbf{a}^T \mathbf{1} = 1$ . Behavioural threshold  $\vartheta$  is the square root of the decoder variance, which depends on the noise covariance as:

$$\begin{aligned} \vartheta^2 &= \mathbf{w}^T \Sigma_{IL} \mathbf{w} \\ &= \mathbf{w}^T \Sigma \mathbf{w} + \mathbf{w}^T F E F^T \mathbf{w} \\ &= O(N^{-1}) + \mathbf{a}^T W^T F E F^T W \mathbf{a} \\ &\approx \mathbf{a}^T E \mathbf{a} \end{aligned} \tag{S3.1}$$

where we have again assumed that the variance from the extensive information part is dominated by the limited information part.

#### S3.2 Limited information model: two populations

For two populations, **Eqn (S3.1)** yields  $\vartheta^2 \approx \mathbf{a}^T E \mathbf{a} = a_x^2 \varepsilon_{xx} + a_y^2 \varepsilon_{yy} + 2a_x a_y \varepsilon_{xy}$  to give **Eqn (22)** in **Methods**. When the population readout vector  $\mathbf{a}$  is suboptimal, the threshold implied by **Eqn (S3.1)** will be smaller than the optimal threshold (**Eqn (22)**). The quadratic form of this equation underlies the  $U$ -shaped performance curve shown in **Fig 8B**.

In this formulation, selective inactivation of a neural population simply redefines the population readout vector  $\mathbf{a}$ . For example, completely inactivating one of two populations corresponds to setting  $\mathbf{a} = (0,1)$ . Behavioural thresholds following inactivation of either  $x$  or  $y$  is given by:

$$\vartheta_{-x}^2 \approx (0,1)^T W^T F E F^T W (0,1) \approx \varepsilon_{yy} \tag{S3.2}$$

$$\vartheta_{-y}^2 \approx (1,0)^T W^T F E F^T W (1,0) \approx \varepsilon_{xx} \tag{S3.3}$$

Therefore, the quality of the decoding is determined by the relative weighting  $\mathbf{a}$  of the response in the two populations when both populations are active. However, when one of them is inactivated, the thresholds are near-optimal, limited by noise correlations within the active population.

### S3.3 Extensive information model when decoding only dominant noise modes

If decoding is restricted to the single leading eigenmode within each population  $x$  and  $y$ , then this mode becomes information-limiting in the restricted decoded space. We can express decoding weights as:

$$\mathbf{w} = \tilde{U}\mathbf{a}$$

where

$$\tilde{U} = \begin{bmatrix} \mathbf{u}_x / \mathbf{u}_x^T \mathbf{f}_x' & \mathbf{0} \\ \mathbf{0} & \ddots \end{bmatrix}$$

is a block diagonal  $N \times Z$  matrix containing the leading eigenmode of each area separately, normalized so that  $\tilde{U}^T F = I$  which ensures that the estimators from each population in isolation are unbiased. In this case, behavioural threshold  $\vartheta$  is once again related to the population readout vector  $\mathbf{a}$  according to:

$$\vartheta^2 = \mathbf{w}^T \Sigma \mathbf{w}$$

$$\approx \mathbf{a}^T \tilde{U}^T F E F^T \tilde{U} \mathbf{a}$$

$$\approx \mathbf{a}^T E \mathbf{a}$$

which is identical to the limited information case (**Eqns S3.1 – S3.3**) as a function of  $E$ , because within the decoded subspace the information *is* limited: the extensive information part lies outside. Of course, the values and structure of  $E$  may differ between the extensive and limited information models, as will the subspace of the full population  $\Sigma$  that is characterized by  $E$  and the resultant choice correlations.
