# Supplementary material for: Inferring decoding strategies for multiple correlated neural populations
Source: PubMed Central journal article supplement (PMC6188888; doi:10.1371/journal.pcbi.1006371), 2018-09-24
Supplement: pcbi.1006371.s022.pdf [file pcbi.1006371.s022.pdf]

## S5 Combining choice correlations and inactivation effects

In **S3 Text** and **S4 Text**, we showed how behavioural thresholds ( $\vartheta$ ,  $\vartheta_{-x}$ , and  $\vartheta_{-y}$ ) and multipliers on choice correlations ( $\beta_x$  and  $\beta_y$ ) depend on the relative scaling of weights ( $a_x$  and  $a_y$ ). Now we will combine and invert those results to provide a way to infer the scaling of weights from measurements of thresholds and choice correlations. The ratio of the multipliers  $\beta_x/\beta_y$  can be written explicitly in terms of the elements of  $E$  in **Eqn (S4.2)** in **S4 Text** as:

$$\frac{\beta_x}{\beta_y} = \frac{(E\mathbf{a})_x (\mathbf{a}^T E\mathbf{a})}{(\mathbf{a}^T E\mathbf{a}) (E\mathbf{a})_y} = \frac{(E\mathbf{a})_x}{(E\mathbf{a})_y} = \frac{a_x \varepsilon_{xx} + a_y \varepsilon_{xy}}{a_y \varepsilon_{yy} + a_x \varepsilon_{xy}} \quad (\text{S5.1})$$

### S5.1 Uncorrelated populations

If populations  $x$  and  $y$  are uncorrelated, then  $\varepsilon_{xy} = 0$ . Substituting in **Eqn (S5.1)** gives

$$\frac{\beta_x}{\beta_y} = \frac{a_x \varepsilon_{xx}}{a_y \varepsilon_{yy}} \Leftrightarrow \frac{a_x}{a_y} = \frac{\beta_x \varepsilon_{yy}}{\beta_y \varepsilon_{xx}}$$

If behaviour is indeed largely driven by responses along the leading modes of variance in  $x$  and  $y$ , then from **Eqn (S3.2 – S3.3)** in **S3 Text**, the post-inactivation thresholds are  $\vartheta_{-x}^2 \approx \varepsilon_{yy}$  and  $\vartheta_{-y}^2 \approx \varepsilon_{xx}$ . This allows us to express the relative scalings of weights purely in terms of relative magnitudes of choice correlations and inactivation effects.

$$\frac{a_x}{a_y} = \frac{\beta_x \varepsilon_{yy}}{\beta_y \varepsilon_{xx}} \approx \frac{\beta_x \vartheta_{-x}^2}{\beta_y \vartheta_{-y}^2} \quad (\text{S5.2})$$

This proves **Eqn (20)** in the main text.

### S5.2 Correlated populations

Let populations  $x$  and  $y$  be correlated according to  $\varepsilon_{xy} = \gamma \varepsilon_{xx}$  where  $\gamma$  denotes the strength of correlations between neurons across the populations relative to those within population  $x$ . We can re-write **Eqn (S5.1)** as

$$\frac{\beta_x}{\beta_y} = \frac{a_x \varepsilon_{xx} + a_y \gamma \varepsilon_{xx}}{a_y \varepsilon_{yy} + a_x \gamma \varepsilon_{xx}} = \frac{\frac{a_x}{a_y} + \gamma}{\frac{\varepsilon_{yy}}{\varepsilon_{xx}} + \gamma \frac{a_x}{a_y}} \Leftrightarrow \frac{a_x}{a_y} = \left( \frac{\beta_x \varepsilon_{yy}}{\beta_y \varepsilon_{xx}} - \gamma \right) \left( 1 - \frac{\beta_x}{\beta_y} \gamma \right)^{-1}$$

Once again, using  $\vartheta_{-x}^2 \approx \varepsilon_{yy}$  and  $\vartheta_{-y}^2 \approx \varepsilon_{xx}$ , we get:

$$\frac{a_x}{a_y} = \left( \frac{\beta_x \vartheta_{-x}^2}{\beta_y \vartheta_{-y}^2} - \gamma \right) \left( 1 - \frac{\beta_x}{\beta_y} \gamma \right)^{-1} \quad (\text{S5.3})$$

This proves **Eqn (21)** in the main text.
