# Supplementary material for: Inferring decoding strategies for multiple correlated neural populations
Source: PubMed Central journal article supplement (PMC6188888; doi:10.1371/journal.pcbi.1006371), 2018-09-24
Supplement: pcbi.1006371.s024.pdf [file pcbi.1006371.s024.pdf]

## S7 Modeling partial inactivation

The results derived in **S3 Text** and **S5 Text** assumed that inactivation experiments silence all neurons in the target area. In this section, we re-derive the expressions for decoding weights by relaxing this assumption. To accomplish this, we introduce additional parameters  $\rho_x$  to model the fractions of neurons in area  $x$ , that remain following inactivation of those areas. **Eqns (18)** and **(19)** in the main text describe the general effects of partial inactivation in multiple populations. Here we describe the specific consequences for two populations, as applied to our experimental data.

**Eqns (S3.2)** and **(S3.3)** in **S3 Text** hold when inactivation is complete ( $\rho_x = 0$  or  $\rho_y = 0$ ) so that  $\mathbf{a} = (0,1)$  or  $(1,0)$  depending on whether  $x$  or  $y$  was inactivated. If inactivation of  $x$  was incomplete, then neurons that remain in that area will continue to influence the animal's choice with scaling  $\rho_x a_x$ , while that of the intact area  $y$  would become  $1 - \rho_x a_x$ . Therefore using  $\mathbf{a} = (\rho_x a_x, 1 - \rho_x a_x)$  modifies **Eqn (S3.2)** in **S3 Text** to give:

$$\vartheta_{-x}^2 \approx \mathbf{a}^T E \mathbf{a} \approx (\rho_x a_x)^2 \varepsilon_{xx} + (1 - \rho_x a_x)^2 \varepsilon_{yy} + 2\rho_x a_x (1 - \rho_x a_x) \varepsilon_{xy} \quad (\text{S7.1})$$

Similarly if inactivation of  $y$  was incomplete, then  $\mathbf{a} = (1 - \rho_y a_y, \rho_y a_y)$  which modifies **Eqn (S3.3)** in **S3 Text** as:

$$\vartheta_{-y}^2 \approx (1 - \rho_y a_y)^2 \varepsilon_{xx} + (\rho_y a_y)^2 \varepsilon_{yy} + 2\rho_y a_y (1 - \rho_y a_y) \varepsilon_{xy} \quad (\text{S7.2})$$

The above equations, together with the one that defines choice correlations (**Eqn S5.1** in **S5 Text**), can be used to infer the joint distribution of fractions  $\rho_x$  and  $\rho_y$  and readout weights that are consistent with experimental data.

Note that **Eqns (S7.1)** and **(S7.2)** are uncoupled if  $\varepsilon_{xy} = 0$ . This is the case for the extensive information model, and therefore  $\rho_x$  and  $\rho_y$  are independent for that model (**S15A Fig**). For the limited information model on the other hand, the above equations provide a joint constraint on  $a_x$ ,  $\rho_x$ , and  $\rho_y$  and therefore their solutions are correlated (**S15B Fig**).
